# Supplementary material for: Photoluminescence properties of single-component white-emitting Ca9Bi(PO4)7:Ce3+,Tb3+,Mn2+phosphors for UV LEDs
Source: Royal Society of Chemistry journal article supplement (doi:10.1039/c5tc00927h), 2015-01-01
Supplement: c5tc00927h1.pdf [file c5tc00927h1.pdf]

## Supporting Information

### Photolumuminescence properties of single-component white-emitting $\text{Ca}_9\text{Bi}(\text{PO}_4)_7:\text{Ce}^{3+}, \text{Tb}^{3+}, \text{Mn}^{2+}$ phosphors for UV LEDs

Kai Li,<sup>ab</sup> Mengmeng Shang,<sup>a</sup> Yang Zhang,<sup>ab</sup> Jian Fan,<sup>a</sup> Hongzhou Lian<sup>\*a</sup> and Jun Lin<sup>\*a</sup>

<sup>a</sup>State Key Laboratory of Rare Earth Resource Utilization, Changchun Institute of Applied Chemistry, Chinese Academy of Sciences, Changchun 130022, P. R. China.

<sup>b</sup>University of Chinese Academy of Sciences, Beijing 100049, P. R. China.

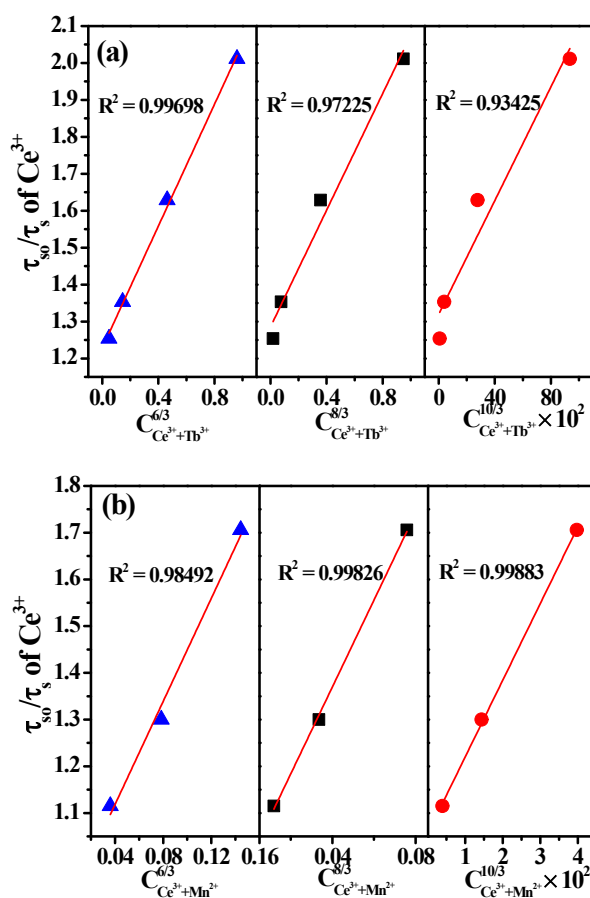

Fig.S1 (a)  $\tau_{S0}/\tau_S - C^{w/3}$  plots of  $\text{Ce}^{3+}, \text{Tb}^{3+}$  co-doped CBPO phosphors. (b)  $\tau_{S0}/\tau_S - C^{w/3}$  plots of  $\text{Ce}^{3+}, \text{Mn}^{2+}$  co-doped CBPO phosphors.
